# Supplementary material for: Performance of Plasma Coproporphyrin I and III as OATP1B1 Biomarkers in Humans
Source: PubMed Central journal article supplement — Clin Pharmacol Ther. 2021 Oct 15;110(6):1622–32. doi: 10.1002/cpt.2429 (PMC9292572; doi:10.1002/cpt.2429), 2021-10-15
Supplement: CPT-110-1622-s001.pdf [file CPT-110-1622-s001.pdf]

**Table S2 Comparison of plasma GCDCA-3G, GDCA-3G, CPI and CPIII performances in detecting different genetically-predicted OATP1B1 function groups versus normal function group (n=166)**

| OATP1B1 biomarker                                                                 | Mean AUPRC (95% CI)      | F1 <sub>max</sub> | Mean difference from GCDCA-3G (95% CI) | Mean AUROC (95% CI)  | Difference from GCDCA-3G  |         |
|-----------------------------------------------------------------------------------|--------------------------|-------------------|----------------------------------------|----------------------|---------------------------|---------|
|                                                                                   |                          |                   |                                        |                      | Mean (95% CI)             | P value |
| Highly increased function (n=5), baseline AUPRC = 0.0292 and baseline AUROC = 0.5 |                          |                   |                                        |                      |                           |         |
| GCDCA-3G*                                                                         | 0.202 (0.0227, 0.692)    | 0.500             | -                                      | 0.817 (0.751, 0.872) | -                         | -       |
| GDCA-3G*                                                                          | 0.0526 (0.00109, 0.738)  | 0.162             | -0.149 (-0.0251, -0.545)               | 0.641 (0.564, 0.713) | -0.177 (-0.0707, -0.282)  | 0.00110 |
| CPI                                                                               | 0.210 (0.0300, 0.696)    | 0.545             | 0.00847 (-0.00951, 0.282)              | 0.720 (0.647, 0.786) | -0.0970 (0.128, -0.322)   | 0.398   |
| CPIII                                                                             | 0.0509 (0.000995, 0.743) | 0.200             | -0.151 (-0.0288, -0.555)               | 0.564 (0.486, 0.639) | -0.254 (-0.0641, -0.443)  | 0.00870 |
| Increased function (n=59), baseline AUPRC = 0.262 and baseline AUROC = 0.5        |                          |                   |                                        |                      |                           |         |
| GCDCA-3G*                                                                         | 0.351 (0.240, 0.480)     | 0.451             | -                                      | 0.610 (0.543, 0.674) | -                         | -       |
| GDCA-3G*                                                                          | 0.366 (0.253, 0.495)     | 0.473             | 0.0150 (-0.0440, 0.0411)               | 0.656 (0.590, 0.718) | 0.0460 (0.0354, -0.128)   | 0.268   |
| CPI                                                                               | 0.416 (0.298, 0.545)     | 0.428             | 0.0658 (0.0236, 0.124)                 | 0.578 (0.511, 0.644) | -0.0317 (0.0637, -0.127)  | 0.515   |
| CPIII                                                                             | 0.306 (0.203, 0.434)     | 0.417             | -0.0443 (-0.00538, -0.0676)            | 0.531 (0.464, 0.598) | -0.0789 (0.0172, -0.175)  | 0.108   |
| Decreased function (n=113), baseline AUPRC = 0.405 and baseline AUROC = 0.5       |                          |                   |                                        |                      |                           |         |
| GCDCA-3G*                                                                         | 0.568 (0.475, 0.656)     | 0.601             | -                                      | 0.626 (0.567, 0.683) | -                         | -       |
| GDCA-3G*                                                                          | 0.532 (0.440, 0.621)     | 0.593             | -0.0361 (-0.0129, -0.0628)             | 0.627 (0.567, 0.684) | 0.0004 (-0.0676, 0.0684)  | 0.991   |
| CPI                                                                               | 0.489 (0.398, 0.581)     | 0.577             | -0.0785 (-0.0564, -0.109)              | 0.560 (0.500, 0.619) | -0.0663 (0.00807, -0.141) | 0.0806  |
| CPIII                                                                             | 0.451 (0.362, 0.543)     | 0.579             | -0.117 (0.00549, -0.244)               | 0.528 (0.467, 0.588) | -0.0986 (0.0138, -0.211)  | 0.0854  |
| Poor function (n=13), baseline AUPRC = 0.0726 and baseline AUROC = 0.5            |                          |                   |                                        |                      |                           |         |
| GCDCA-3G*                                                                         | 0.961 (0.597, 0.998)     | 0.897             | -                                      | 0.997 (0.973, 1.000) | -                         | -       |
| GDCA-3G*                                                                          | 0.717 (0.431, 0.894)     | 0.720             | -0.245 (-0.0753, -0.426)               | 0.878 (0.821, 0.922) | -0.119 (0.0224, -0.260)   | 0.0993  |
| CPI                                                                               | 0.612 (0.341, 0.828)     | 0.571             | -0.350 (-0.161, -0.555)                | 0.895 (0.841, 0.936) | -0.101 (0.00877, -0.212)  | 0.0712  |
| CPIII                                                                             | 0.150 (0.0370, 0.447)    | 0.267             | -0.812 (-0.678, -0.877)                | 0.718 (0.646, 0.783) | -0.279 (-0.148, -0.410)   | <0.0001 |

CPI and CPIII data are adjusted for sex, body weight and clinical trial. GCDCA-3G and GDCA-3G data are adjusted for sex. Phenotypes classified by *SLCO1B1* allele pairs: highly increased function phenotype, two increased function (\*14 or \*20) alleles; increased function phenotype, one normal function (\*1 or \*37) allele with one increased function allele; normal function phenotype, two normal function alleles; decreased function phenotype, one normal function allele or one increased function allele with one decreased function (\*5 or \*15) allele; poor function phenotype, two decreased function alleles; AUPRC, area under precision-recall curve; AUROC, area under receiver operating characteristic curve; CI, confidence interval; CPI, coproporphyrin I; CPIII, coproporphyrin III; GCDCA-3G, glycochenodeoxycholate 3-O-glucuronide; GDCA-3G, glycodeoxycholate 3-O-glucuronide; OATP1B1, organic anion transporting polypeptide 1B1. F1<sub>max</sub> represents the maximum harmonic mean of the precision and recall over all measurement levels.

\*These data were reanalyzed from a previously published study (Neuvonen, M. *et al. Clin. Pharmacol. Ther.* **109**, 646-657 (2021)).
