# Supplementary material for: Performance of Plasma Coproporphyrin I and III as OATP1B1 Biomarkers in Humans
Source: PubMed Central journal article supplement — Clin Pharmacol Ther. 2021 Oct 15;110(6):1622–32. doi: 10.1002/cpt.2429 (PMC9292572; doi:10.1002/cpt.2429), 2021-10-15
Supplement: CPT-110-1622-s002.pdf [file CPT-110-1622-s002.pdf]

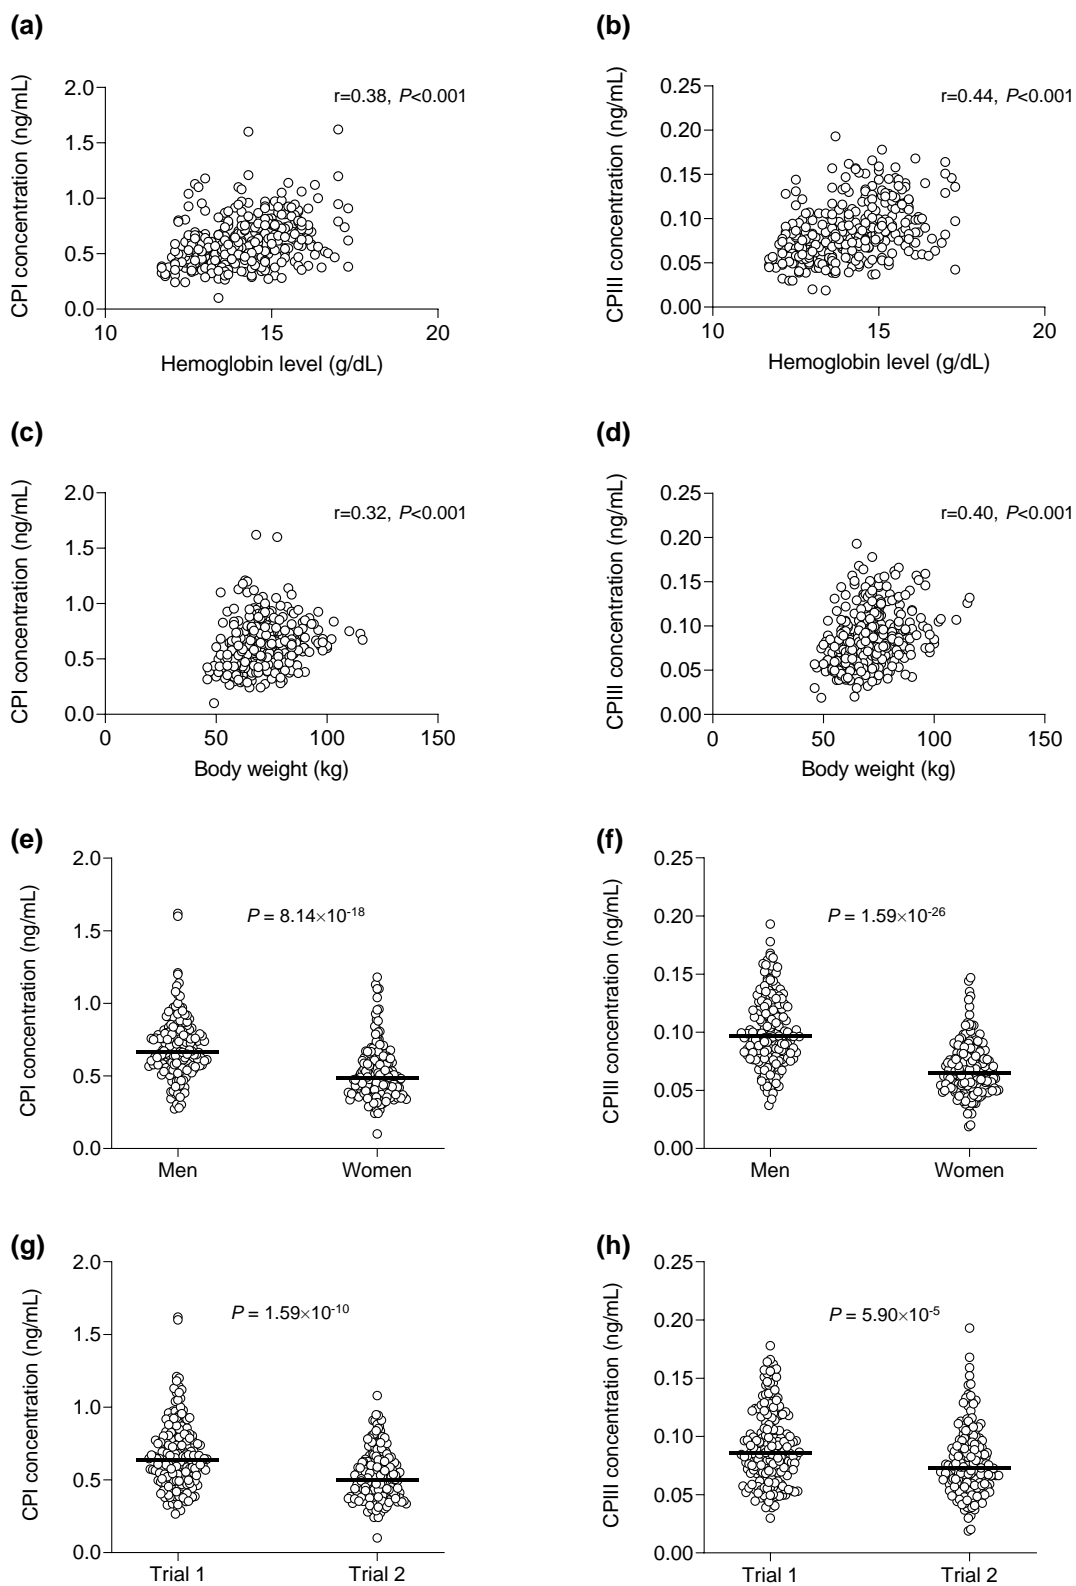

**Figure S1.** The associations of plasma coproporphyrin I and coproporphyrin III concentrations with hemoglobin level (**a, b**), body weight (**c, d**), sex (**e, f**) and clinical trial (**g, h**). Trial 1 was carried out during 2012-2014 and Trial 2 during 2015-2017. Horizontal lines indicate geometric mean values. The analyses were carried out using linear regression analysis for each independent variable separately.
