# Supplementary material for: Performance of Plasma Coproporphyrin I and III as OATP1B1 Biomarkers in Humans
Source: PubMed Central journal article supplement — Clin Pharmacol Ther. 2021 Oct 15;110(6):1622–32. doi: 10.1002/cpt.2429 (PMC9292572; doi:10.1002/cpt.2429), 2021-10-15
Supplement: CPT-110-1622-s003.pdf [file CPT-110-1622-s003.pdf]

**Table S1 Effect of OATP1B1 phenotype on plasma CPI, CPIII, GCDCA-3G and GDCA-3G concentrations in healthy volunteers, with an alternative OATP1B1 phenotype classification considering *SLCO1B1*\*37 as an increased function allele**

| Phenotype (n)                  | Geometric mean ng/mL<br>(95% CI) | Ratio to normal function<br>(95% CI) | P                      |
|--------------------------------|----------------------------------|--------------------------------------|------------------------|
| <b>CPI</b>                     |                                  |                                      |                        |
| Highly increased function (21) | 0.451 (0.400, 0.507)             | 0.815 (0.717, 0.928)                 | 0.00199                |
| Increased function (93)        | 0.540 (0.510, 0.571)             | 0.977 (0.905, 1.05)                  | 0.539                  |
| Normal function (116)          | 0.553 (0.525, 0.581)             | 1                                    |                        |
| Decreased function (113)       | 0.598 (0.568, 0.629)             | 1.08 (1.01, 1.16)                    | 0.0339                 |
| Poor function (13)             | 0.935 (0.804, 1.09)              | 1.69 (1.44, 1.98)                    | 2.25×10 <sup>-10</sup> |
| <b>CPIII</b>                   |                                  |                                      |                        |
| Highly increased function (21) | 0.0731 (0.0640, 0.0835)          | 0.923 (0.799, 1.07)                  | 0.275                  |
| Increased function (93)        | 0.0791 (0.0743, 0.0843)          | 0.999 (0.912, 1.09)                  | 0.978                  |
| Normal function (116)          | 0.0792 (0.0749, 0.0838)          | 1                                    |                        |
| Decreased function (113)       | 0.0780 (0.0736, 0.0826)          | 0.985 (0.908, 1.07)                  | 0.709                  |
| Poor function (13)             | 0.101 (0.0850, 0.119)            | 1.27 (1.06, 1.52)                    | 0.00840                |
| <b>GCDCA-3G*</b>               |                                  |                                      |                        |
| Highly increased function (21) | 15.5 (11.9, 20.0)                | 0.552 (0.418, 0.730)                 | 3.68×10 <sup>-5</sup>  |
| Increased function (93)        | 26.2 (23.2, 29.6)                | 0.937 (0.795, 1.10)                  | 0.434                  |
| Normal function (116)          | 28.0 (25.1, 31.2)                | 1                                    |                        |
| Decreased function (113)       | 44.6 (39.9, 49.9)                | 1.59 (1.36, 1.86)                    | 1.17×10 <sup>-8</sup>  |
| Poor function (13)             | 238 (171, 330)                   | 8.51 (6.03, 12.0)                    | 7.76×10 <sup>-29</sup> |
| <b>GDCA-3G*</b>                |                                  |                                      |                        |
| Highly increased function (21) | 40.1 (27.8, 57.8)                | 0.619 (0.416, 0.921)                 | 0.0180                 |
| Increased function (93)        | 52.6 (44.2, 62.5)                | 0.812 (0.643, 1.02)                  | 0.0792                 |
| Normal function (116)          | 64.8 (55.4, 75.7)                | 1                                    |                        |
| Decreased function (113)       | 106 (90.1, 124)                  | 1.63 (1.30, 2.04)                    | 2.15×10 <sup>-5</sup>  |
| Poor function (13)             | 367 (230, 583)                   | 5.66 (3.47, 9.24)                    | 1.63×10 <sup>-11</sup> |

CPI and CPIII data are adjusted for sex, body weight and clinical trial. GCDCA-3G and GDCA-3G data are adjusted for sex. Phenotypes classified by *SLCO1B1* allele pairs: highly increased function phenotype, two increased function (\*14, \*20 or \*37) alleles; increased function phenotype, one normal function (\*1) allele with one increased function allele; normal function phenotype, two normal function alleles; decreased function phenotype, one normal function allele or one increased function allele with one decreased function (\*5 or \*15) allele; poor function phenotype, two decreased function alleles; CI, confidence interval; CPI, coproporphyrin I; CPIII, coproporphyrin III; GCDCA-3G, glycochenodeoxycholate 3-O-glucuronide; GDCA-3G, glycodeoxycholate 3-O-glucuronide; OATP1B1, organic anion transporting polypeptide 1B1

\*These data were reanalyzed from a previously published study (Neuvonen, M. *et al. Clin. Pharmacol. Ther.* **109**, 646-657 (2021)).
